# Supplementary material for: Reversible solubilisation and precipitation of carbon nanotubes by temperature and pH control in water
Source: Royal Society of Chemistry journal article supplement (doi:10.1039/b905387e), 2009-01-01
Supplement: b905387e.pdf [file b905387e.pdf]

## **Supporting Information**

### **Reversible solubilisation and precipitation of carbon nanotubes by temperature and pH control in water**

**Atsushi Ikeda,\* Yu Totsuka, Kazuyuki Nobusawa and Jun-ichi Kikuchi**

*Graduate School of Materials Science, Nara Institute of Science and Technology, 8916-5 Takayama, Ikoma 630-0192, Japan.*

## Compounds

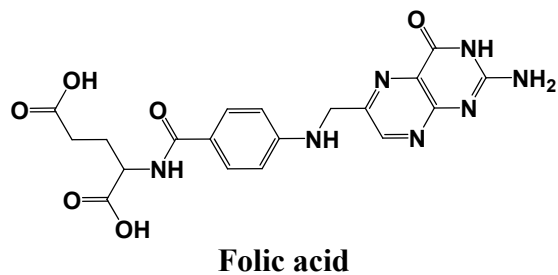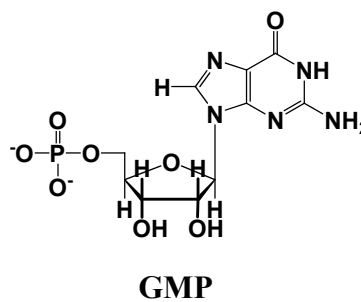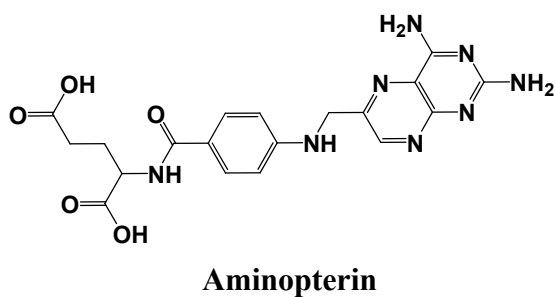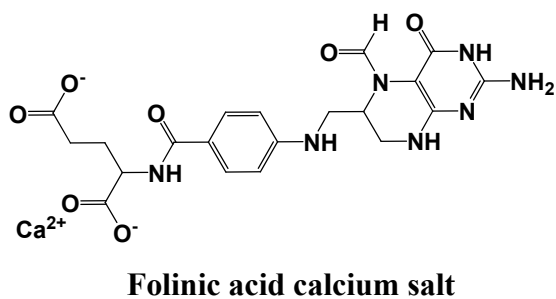

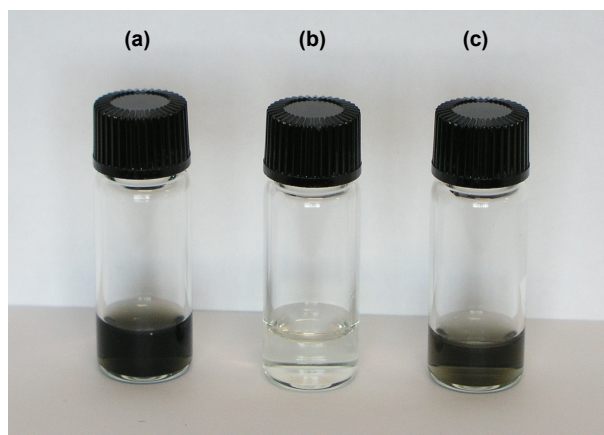

**Fig. S1** Colour photographs of folic acid-SWNTs mixture in (a) basic aqueous solution, (b) acidic aqueous solution after addition of HCl then (c) in basic aqueous solution after adding NaOH.

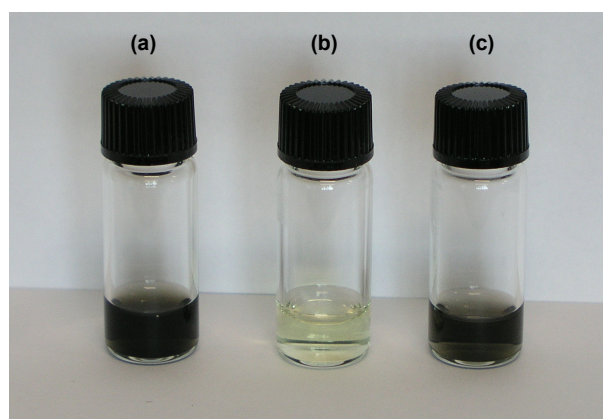

**Fig. S2** Colour photographs of (a) folic acid-SWNTs mixture in basic aqueous solution, (b) after heating at 80°C for 1 h, then (c) after sonication for 2 h.

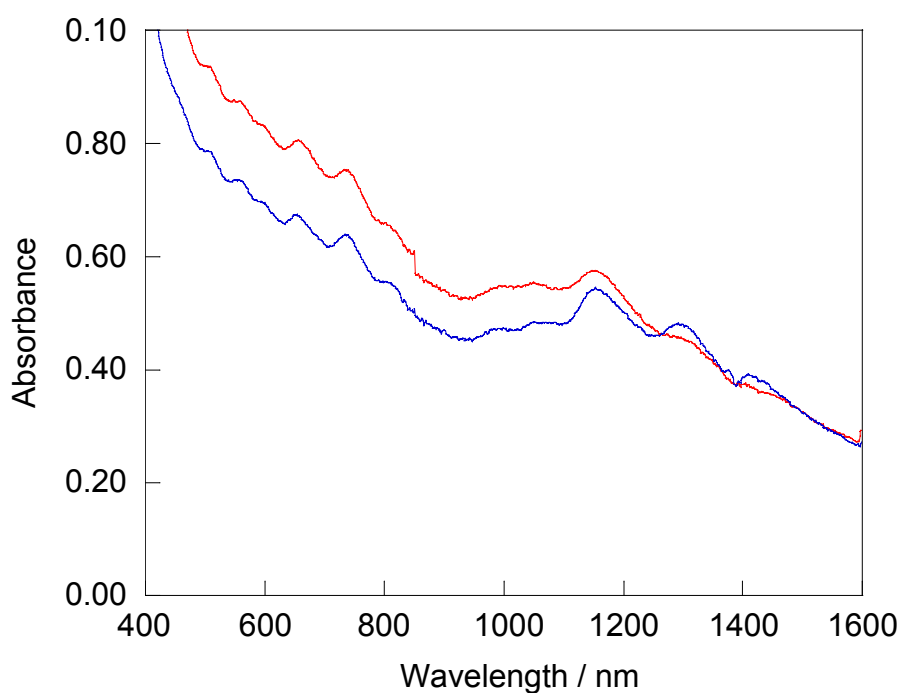

**Fig. S3** Vis-NIR absorption spectra of SWNTs in the presence of GMP after sonication {pH 7.0, (a) red line} and after the addition of the HCl solution {pH 5.8, (b) blue line}. All spectra were recorded at 25°C with a 1 mm cell.

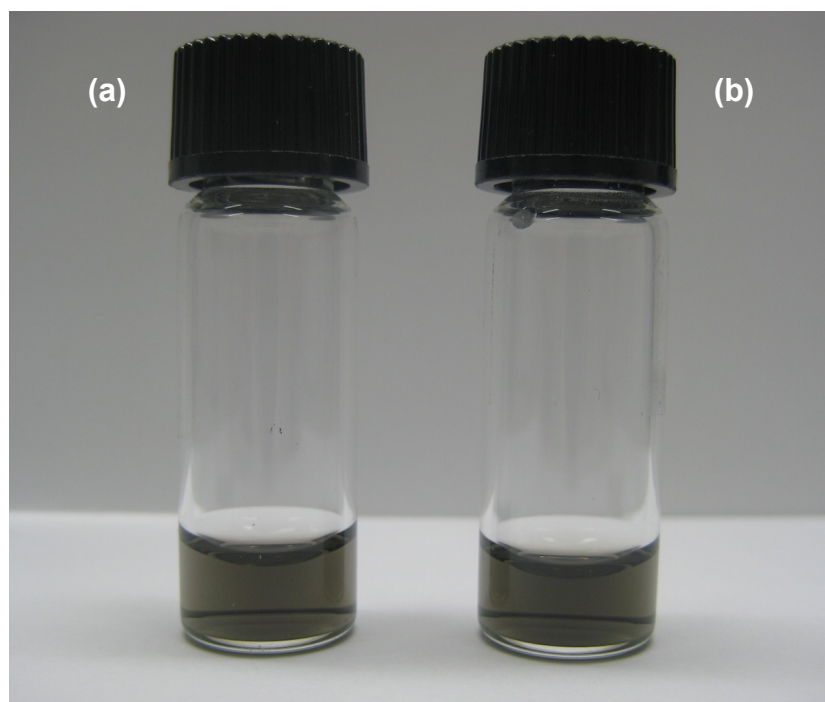

**Fig. S4** Photographs of GMP-SWNTs mixture in (a) aqueous solution (pH 7.0) and (b) acidic aqueous solution (pH 5.8) after addition of HCl.

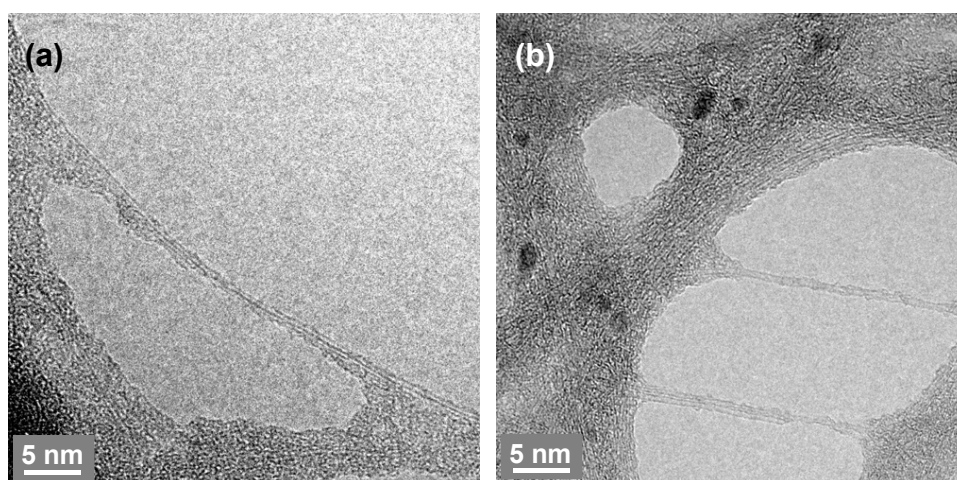

**Fig. S5** TEM images of the folic acid·SWNT complexes in other areas of the image in Fig. 7a.
